# Supplementary material for: Radiographic and computed tomographic features of caval foramen hernias of the liver in 7 dogs: mimicking lung nodules
Source: PubMed Central journal article supplement — J Vet Med Sci. 2016 Jul 16;78(11):1693–7. doi: 10.1292/jvms.16-0161 (PMC5138423; doi:10.1292/jvms.16-0161), 2016-07-16
Supplement: jvms-78-1693-s001.pdf [file jvms-78-1693-s001.pdf]

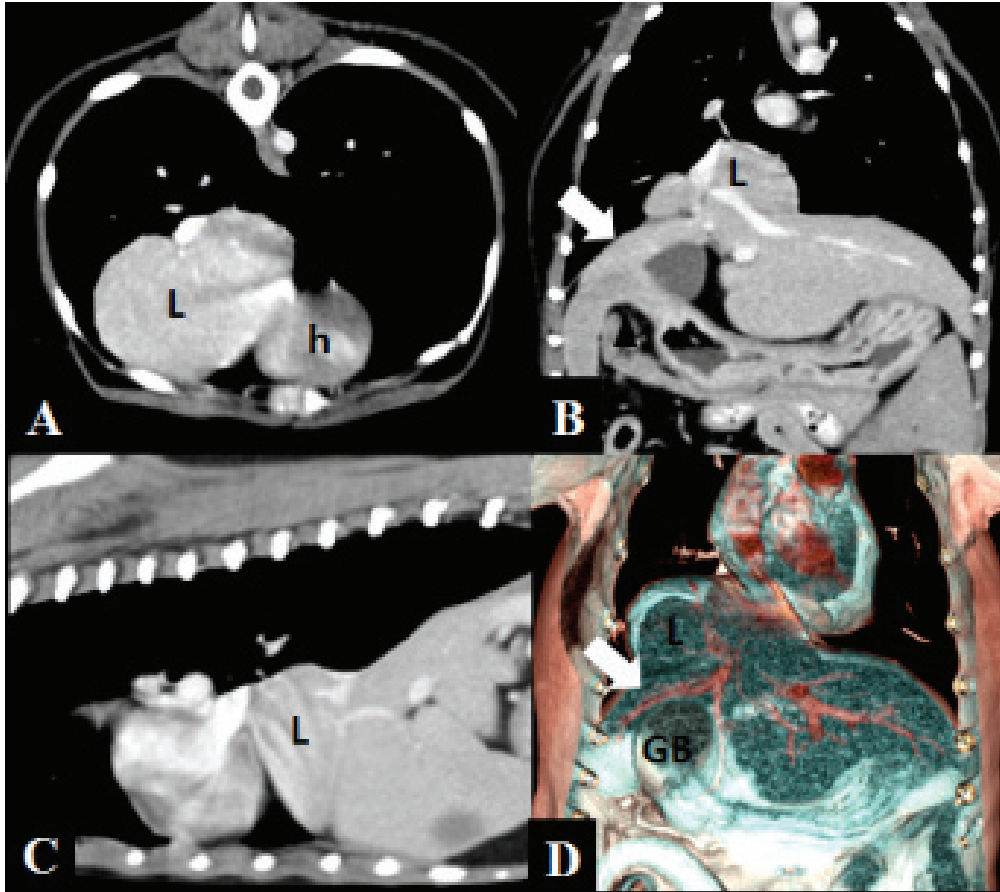

**Supplementary Figure.** Post-contrast CT images of an entire single liver lobe hernia in dog 4. The entire right lateral lobe (L) shows iso-attenuation to the hepatic parenchyma and is herniated through the caval foramen; the right medial lobe is deviated laterally (arrows). (A, transverse plane; B, dorsal plane; C, sagittal plane; D, volume-rendered image, dorsal plane; h, heart; GB, gall bladder)
